# Supplementary material for: Construction of hydrogen bonding and coordination networks based on ethynylpyridine-appended nucleobases
Source: Royal Society of Chemistry journal article supplement (doi:10.1039/d0ce01661f), 2020-12-14

## **Construction of hydrogen bonding and coordination networks based on ethynylpyridine-appended nucleobases**

Christophe Kahlfuss, Eliot Starck, Elsa Tufenkjian, Nathalie Kyritsakas, Abdelaziz Jouaiti, Stéphane A. Baudron, Mir Wais Hosseini and Véronique Bulach\*

Université de Strasbourg, CNRS, CMC UMR 7140, 4 rue Blaise Pascal, F-67000, Strasbourg, France.  
Fax: 33 368851325; Tel: 33 368851327;

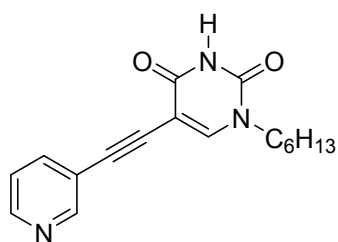

Chemical Formula:

$C_{17}H_{19}N_3O_2$

Exact Mass: 297,15

Molecular Weight: 297,36

**Fig. ESI 1.**  $^1H$  NMR spectrum of **C<sub>6</sub>U-3Py** (500 MHz,  $d_6$ -DMSO, 298 K). \* = water.

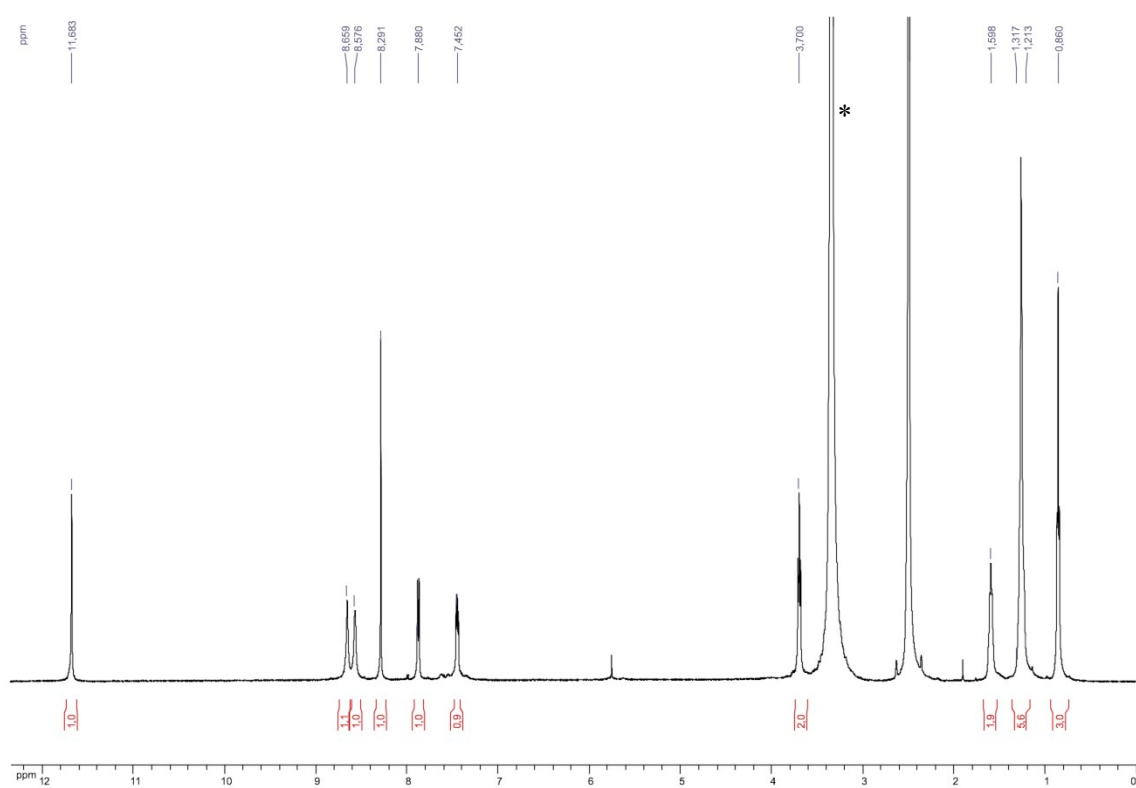

**Fig. ESI 2.**  $^{13}\text{C}$  NMR spectrum of  $\text{C}_6\text{U-3Py}$  (125 MHz,  $\text{d}_6\text{-DMSO}$ , 298 K)

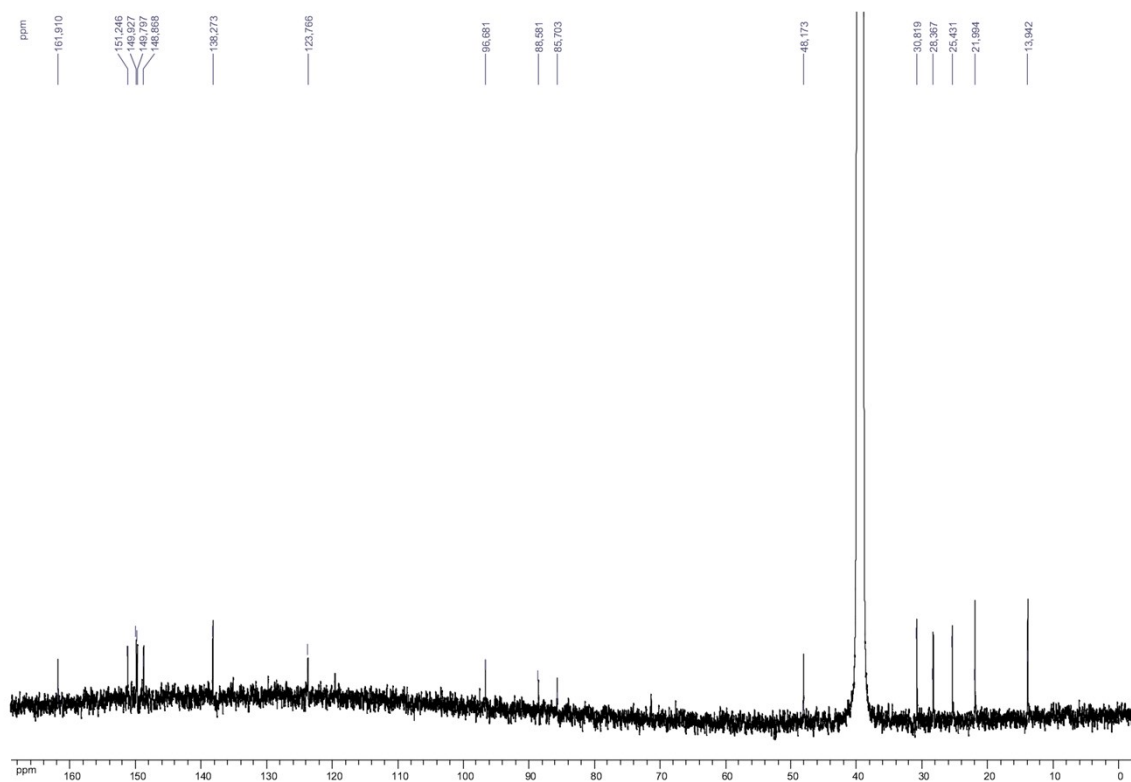

**Fig. ESI 3.**  $^1\text{H-}^1\text{H}$  COSY map of  $\text{C}_6\text{U-3Py}$  (500 MHz,  $\text{d}_6\text{-DMSO}$ , 298K)

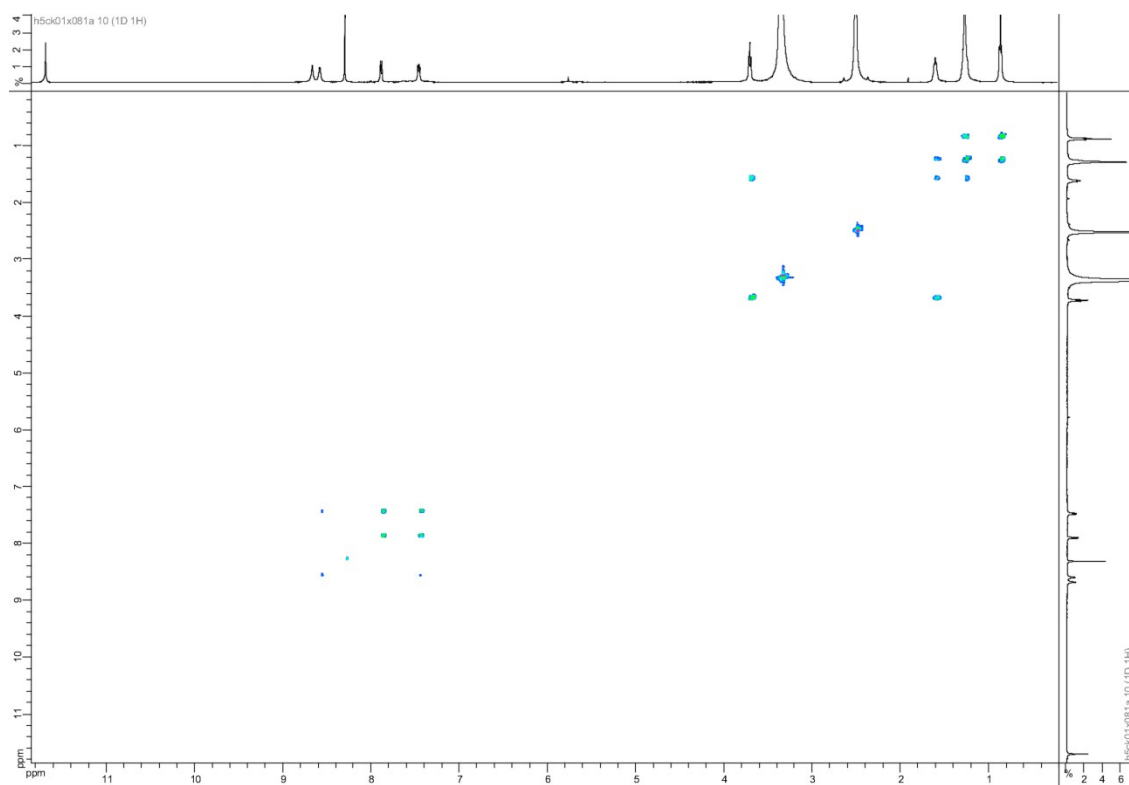



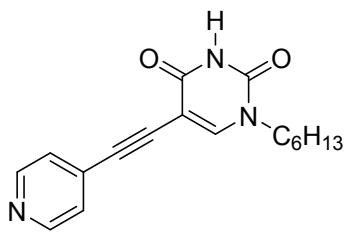

Chemical Formula:  
 $C_{17}H_{19}N_3O_2$   
Exact Mass: 297,15  
Molecular Weight: 297,36

Fig. ESI 6.  $^1H$  NMR spectrum of  $C_6U-4Py$  (500 MHz,  $CDCl_3$ , 298 K)

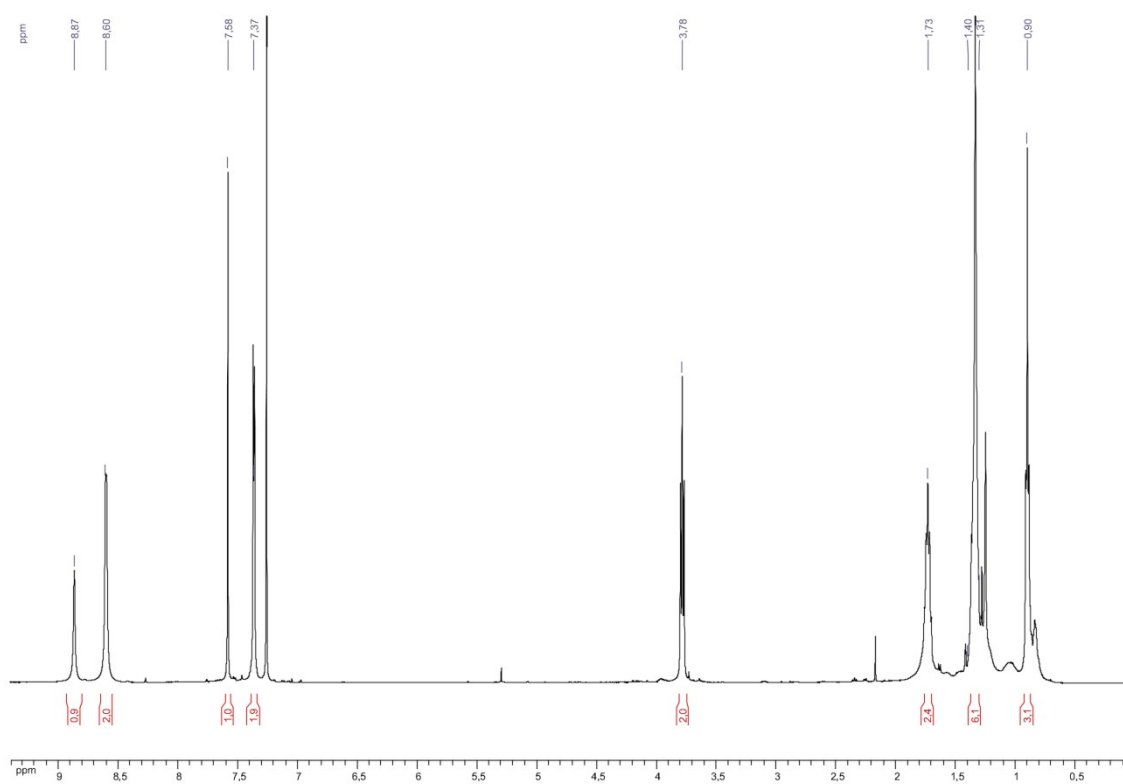

**Fig. ESI 7.**  $^{13}\text{C}$  NMR spectrum of  $\text{C}_6\text{U-4Py}$  (125 MHz,  $\text{CDCl}_3$ , 298 K)

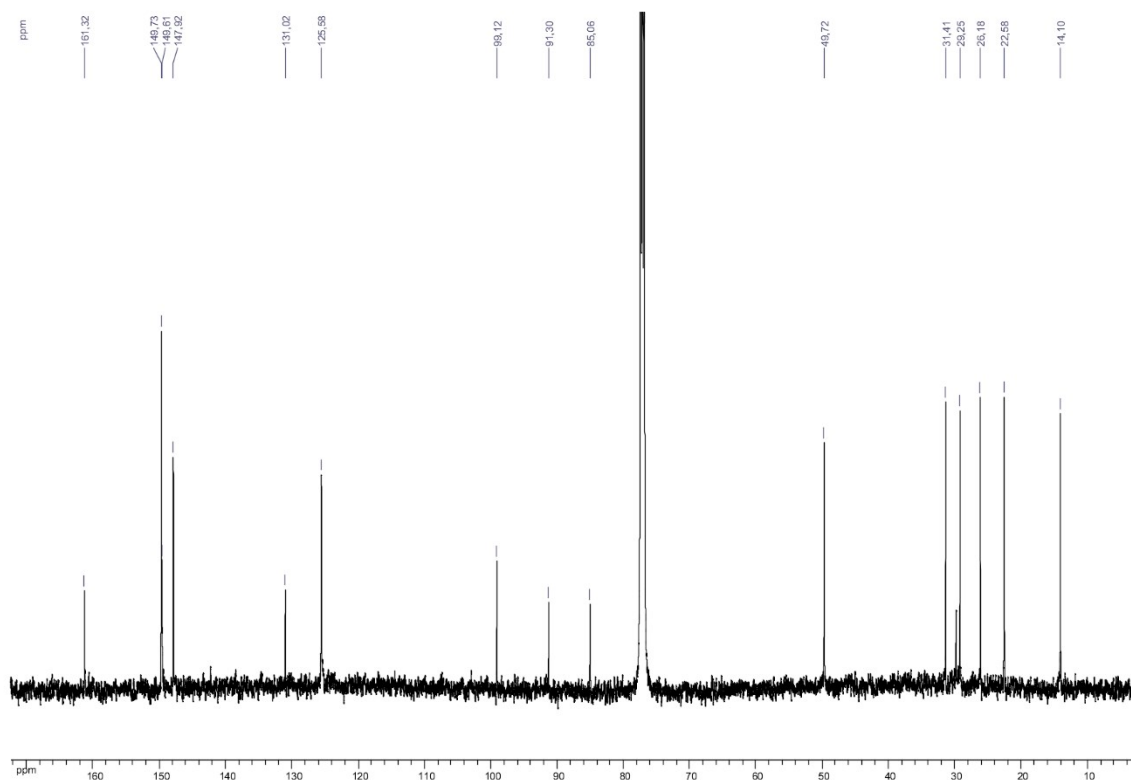

**Fig. ESI 8.**  $^1\text{H-}^1\text{H}$  COSY map of  $\text{C}_6\text{U-4Py}$  (500 MHz,  $\text{CDCl}_3$ , 298K)

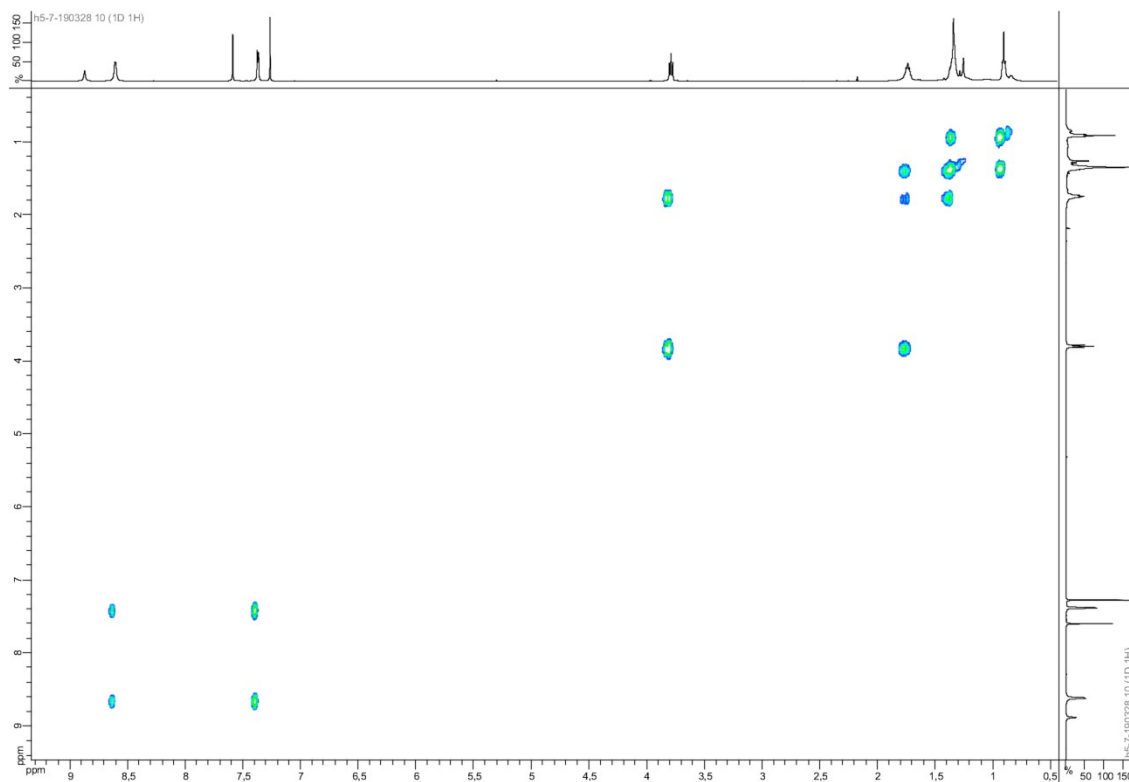



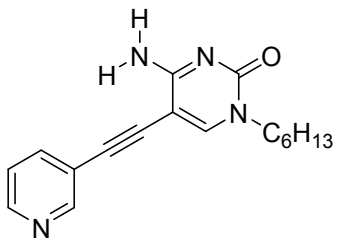

Chemical Formula:  
 $C_{17}H_{20}N_4O$   
 Exact Mass: 296,16  
 Molecular Weight: 296,37

**Fig. ESI 11.**  $^1H$  NMR spectrum of  $C_6C-3Py$  (500 MHz,  $d_6$ -DMSO, 298 K). \* = water.

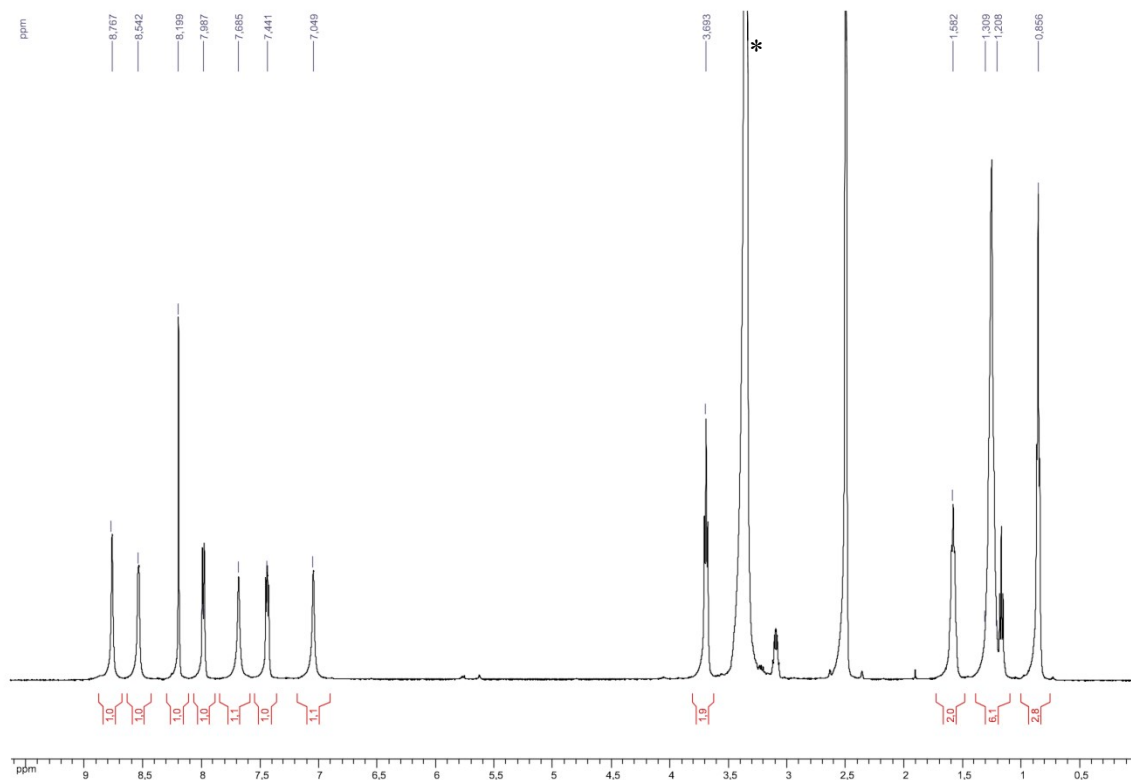



**Fig. ESI 12.**  $^{13}\text{C}$  NMR spectrum of  $\text{C}_6\text{C-3Py}$  (125 MHz,  $\text{d}_6\text{-DMSO}$ , 298 K)

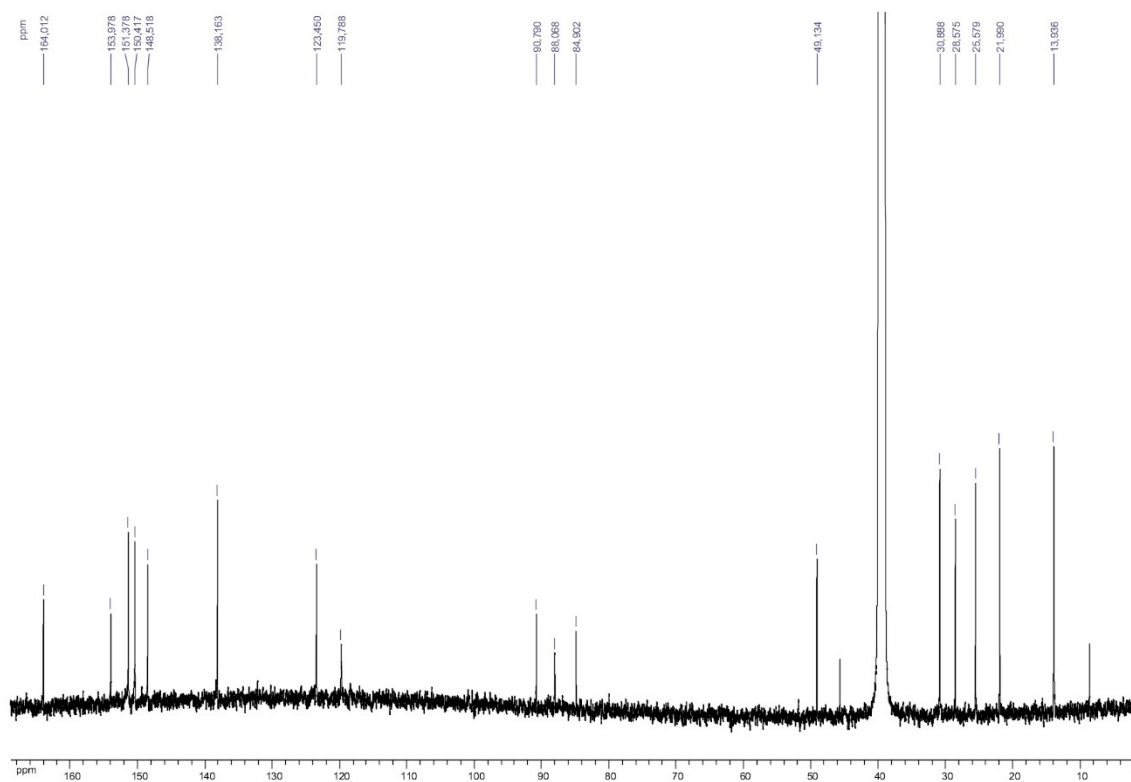

**Fig. ESI 13.**  $^1\text{H-}^1\text{H}$  COSY map of  $\text{C}_6\text{C-3Py}$  (500 MHz,  $\text{d}_6\text{-DMSO}$ , 298K)

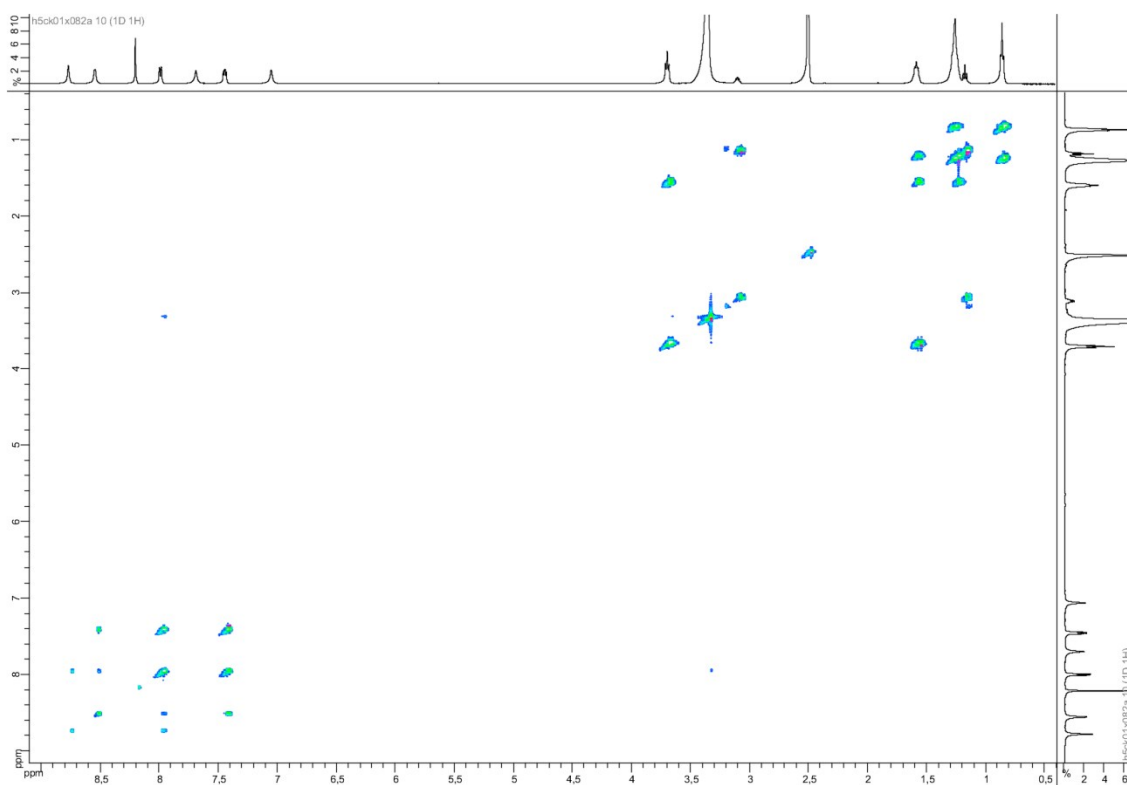

**Fig. ESI 14.**  $^1\text{H}$ - $^{13}\text{C}$  HMBC (pink) and HSQC (blue) map of  $\text{C}_6\text{C-3Py}$  (500 MHz,  $d_6$ -DMSO, 298K)

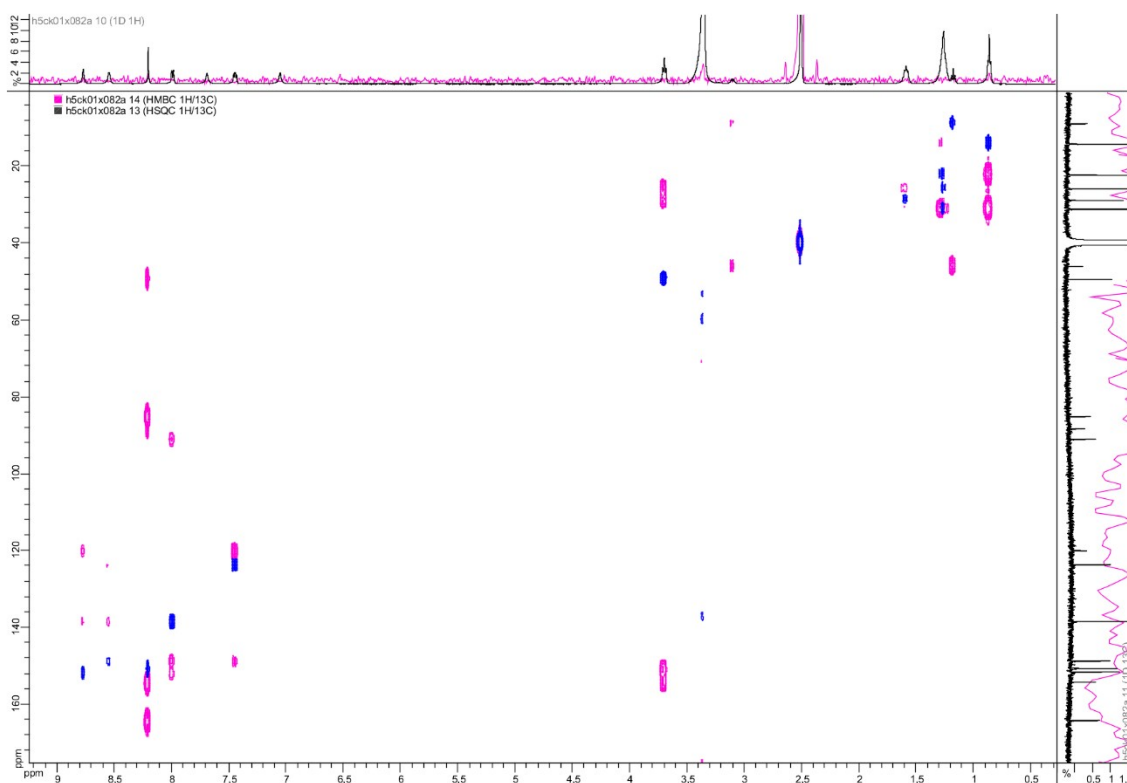

**Fig. ESI 15.** HRMS calculated for  $\text{C}_{17}\text{H}_{21}\text{N}_4\text{O}$   $[\text{M}+\text{H}]^+$  : 297.1710, found : 297.1698.

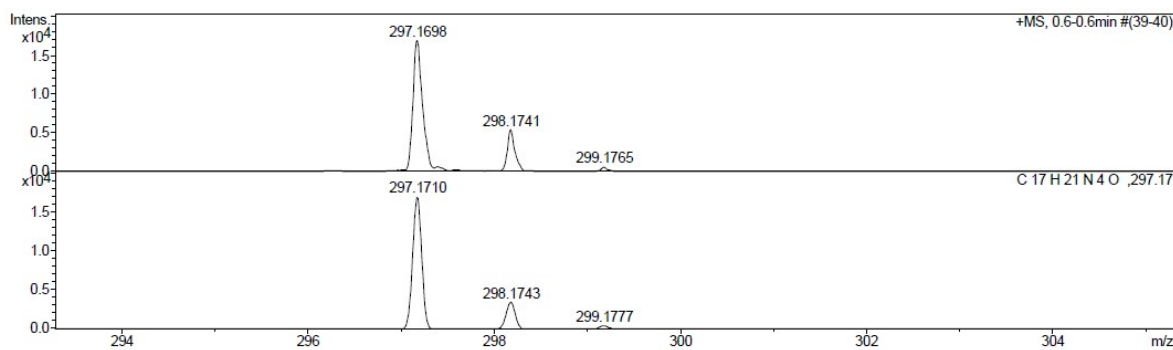

| Meas. m/z | # | Formula                                          | m/z      | err [ppm] | Mean err [ppm] | rdb | N-Rule | e <sup>-</sup> Conf | mSigma | Std I  | Std Mean m/z | Std I VarNorm | Std m/z Diff | Std Comb Dev |
|-----------|---|--------------------------------------------------|----------|-----------|----------------|-----|--------|---------------------|--------|--------|--------------|---------------|--------------|--------------|
| 297.1698  | 1 | C <sub>17</sub> H <sub>21</sub> N <sub>4</sub> O | 297.1710 | 4.1       | 3.3            | 9.5 | ok     | even                | 71.60  | 0.1126 | 0.0011       | 0.0442        | 0.0010       | 0.8427       |

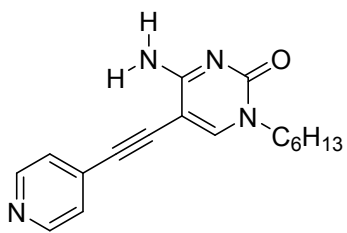

Chemical Formula:  
 $C_{17}H_{20}N_4O$   
Exact Mass: 296,16  
Molecular Weight: 296,37

**Fig. ESI 16.**  $^1H$  NMR spectrum of  $C_6C-4Py$  (500 MHz,  $CDCl_3$ , 298 K)

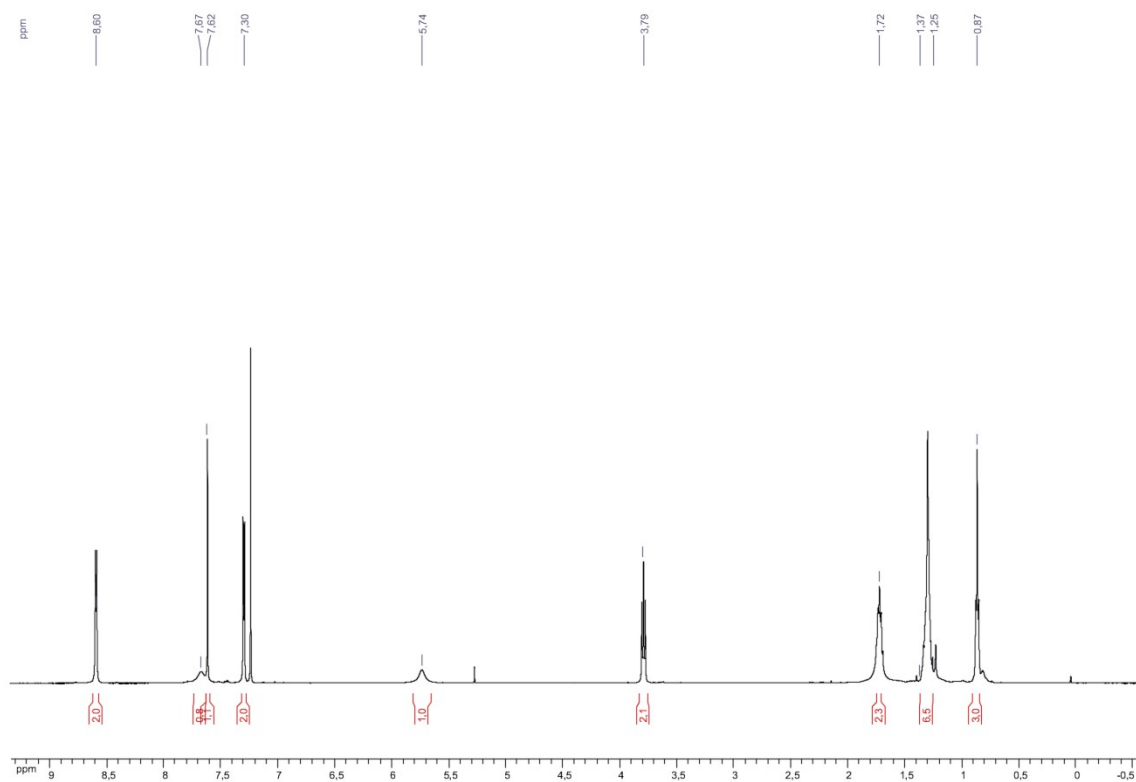

**Fig. ESI 17.**  $^{13}\text{C}$  NMR spectrum of  $\text{C}_6\text{C-4Py}$  (125 MHz,  $\text{CDCl}_3$ , 298 K)

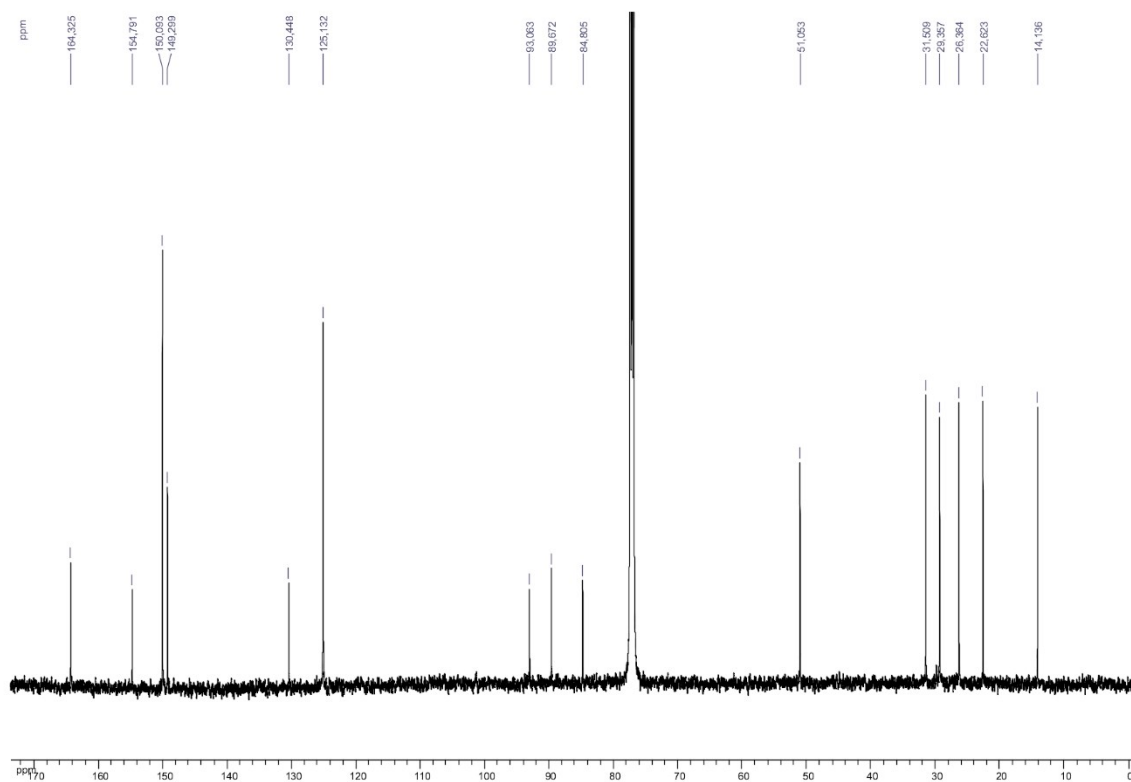

**Fig. ESI 18.**  $^1\text{H-}^1\text{H}$  COSY map of  $\text{C}_6\text{C-4Py}$  (500 MHz,  $\text{CDCl}_3$ , 298K)

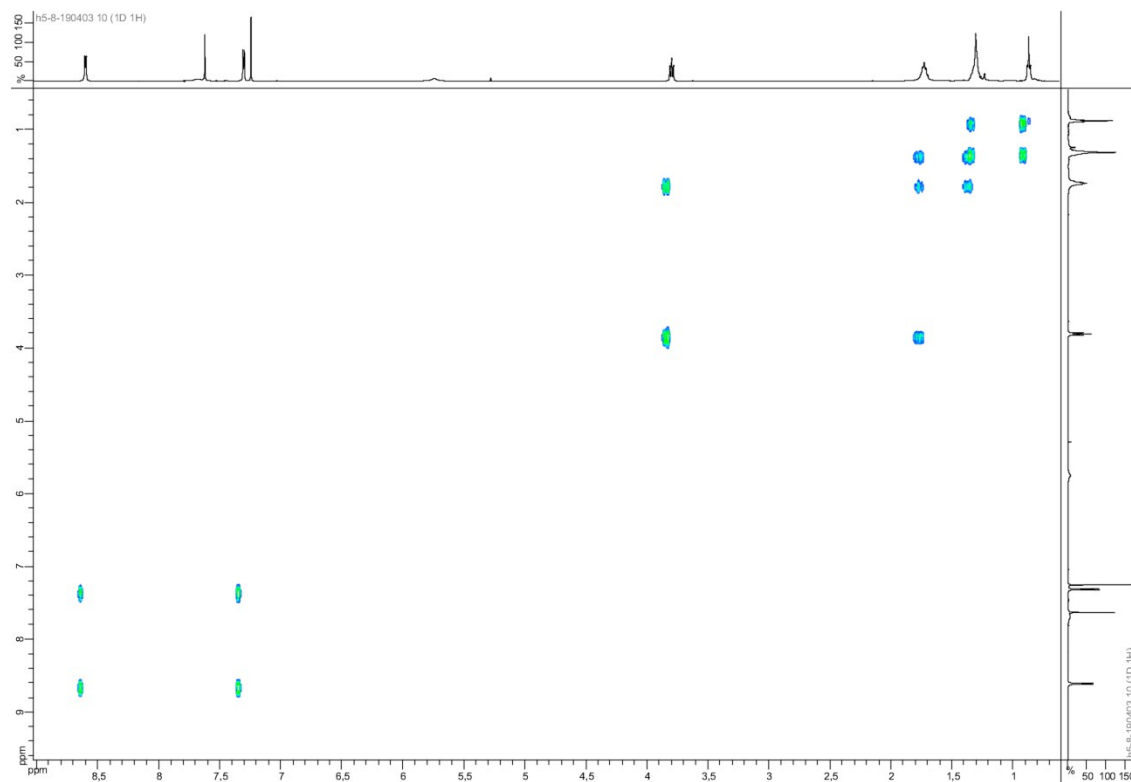



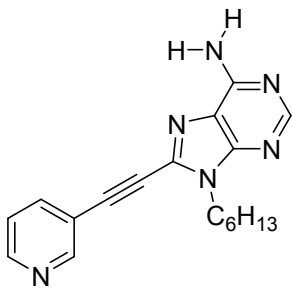

Chemical Formula:  
 $C_{18}H_{20}N_6$   
 Exact Mass: 320,17  
 Molecular Weight:  
 320,40

Fig. ESI 21.  $^1H$  NMR spectrum of  $C_6A-3Py$  (500 MHz,  $d_6$ -DMSO, 298 K). \* = water peak.

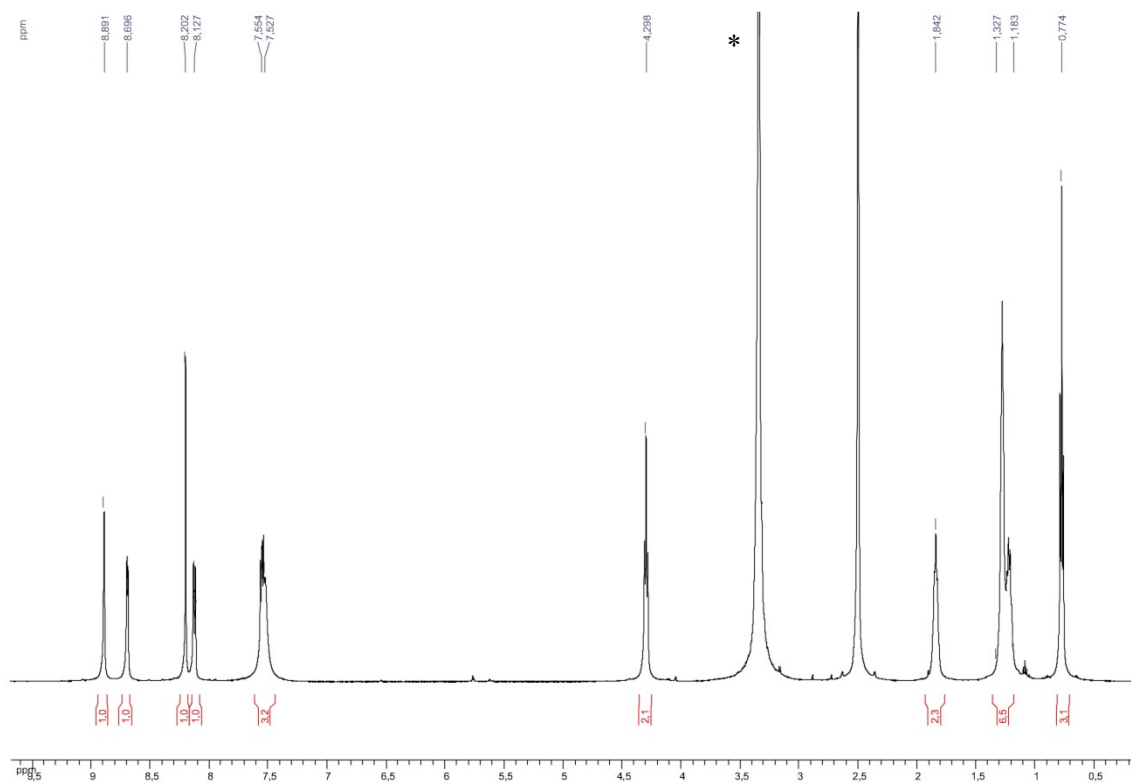

**Fig. ESI 22.**  $^{13}\text{C}$  NMR spectrum of  $\text{C}_6\text{A-3Py}$  (125 MHz,  $\text{d}_6\text{-DMSO}$ , 298 K)

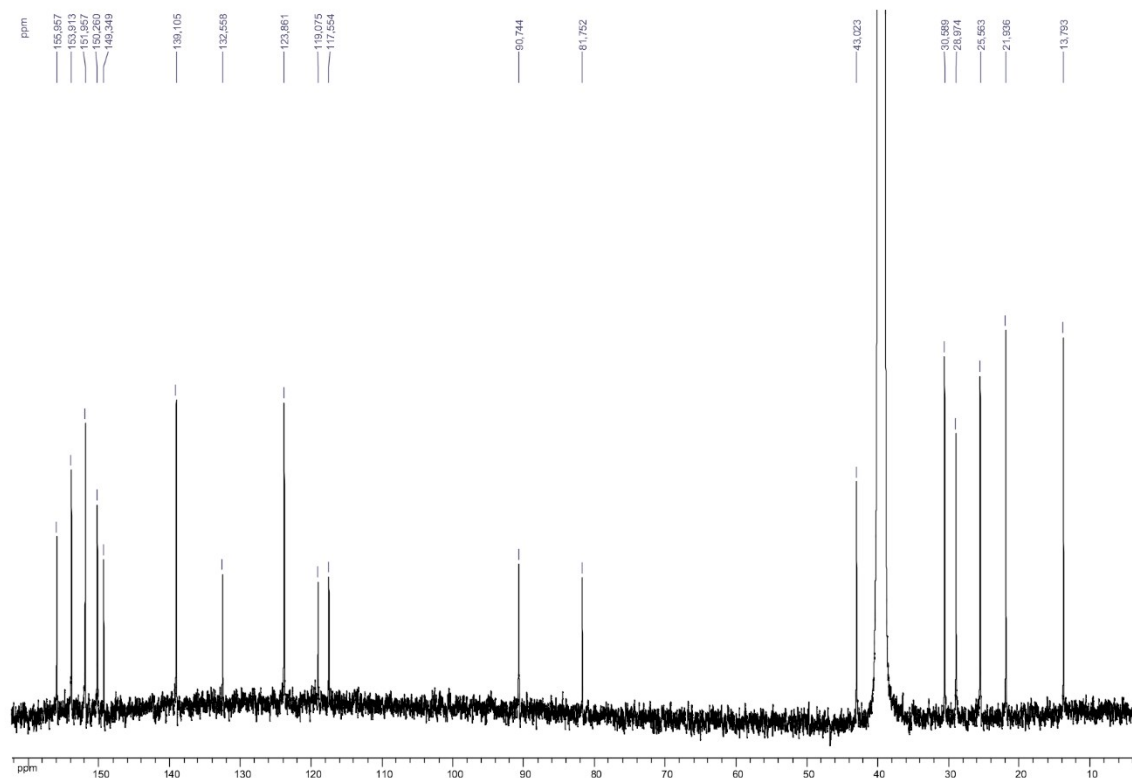

**Fig. ESI 23.**  $^1\text{H-}^1\text{H}$  COSY map of  $\text{C}_6\text{A-3Py}$  (500 MHz,  $\text{d}_6\text{-DMSO}$ , 298K)

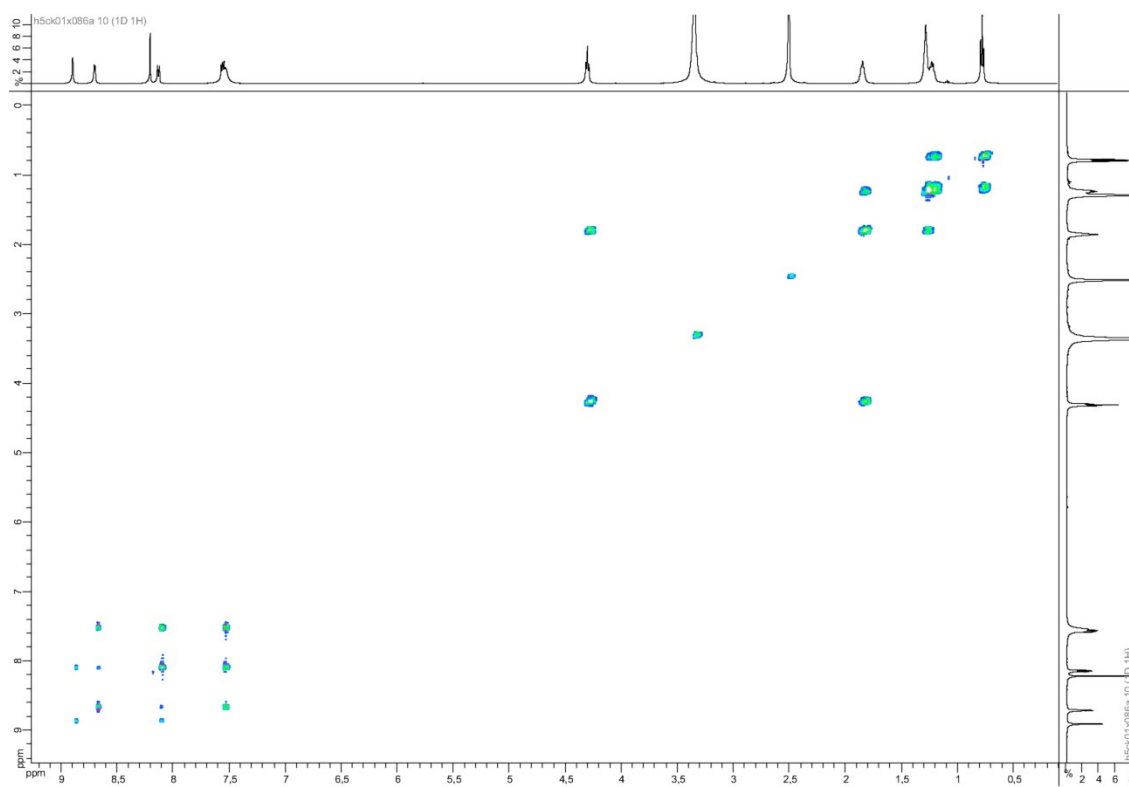

**Fig. ESI 24.**  $^1\text{H}$ - $^{13}\text{C}$  HMBC (pink) and HSQC (blue) map of  $\text{C}_6\text{A-3Py}$  (500 MHz,  $\text{d}_6$ -DMSO, 298K)

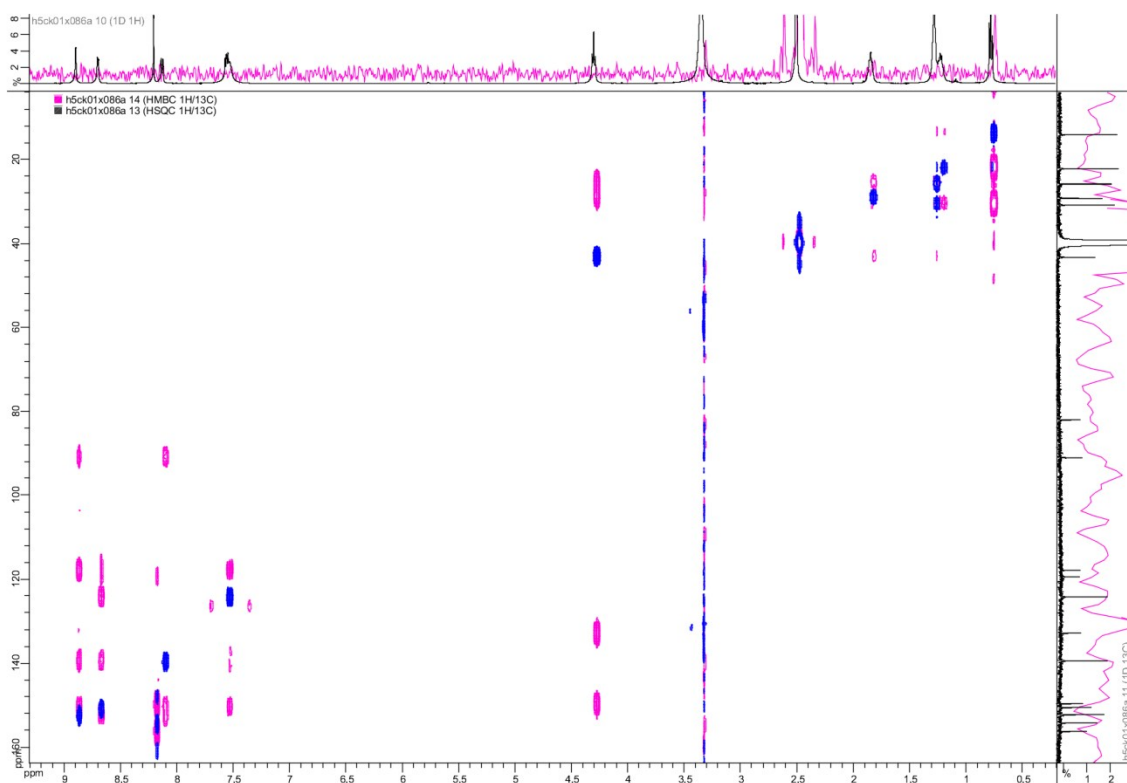

**Fig. ESI 25.** HRMS calculated for  $\text{C}_{18}\text{H}_{21}\text{N}_6$   $[\text{M}+\text{H}]^+$  : 321.1822, found : 321.1830.

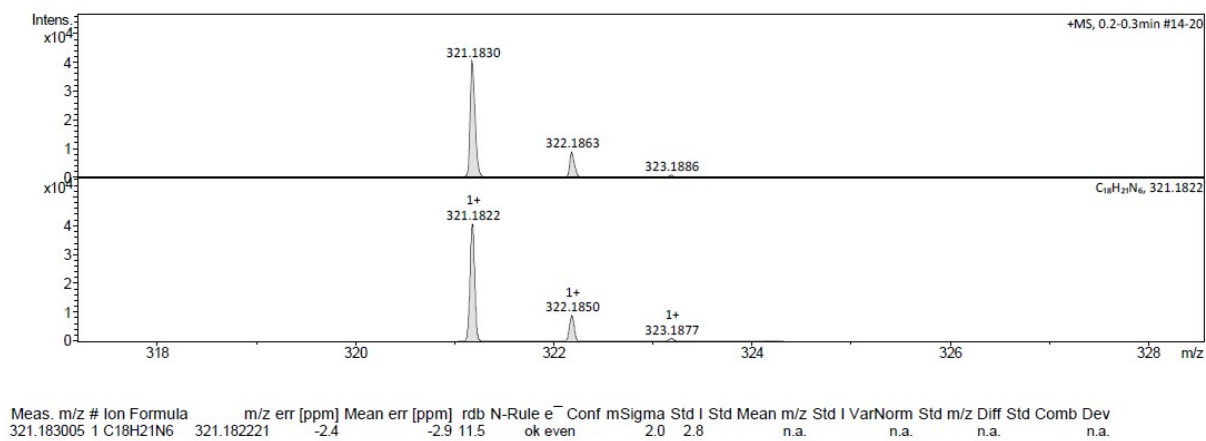



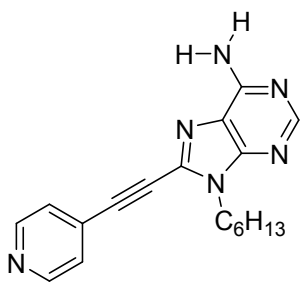

Chemical Formula:  
 $C_{18}H_{20}N_6$   
 Exact Mass: 320,17  
 Molecular Weight:  
 320,40

**Fig. ESI 26.**  $^1H$  NMR spectrum of **C<sub>6</sub>A-4Py** (500 MHz,  $d_7$ -DMF, 298 K). \* = water.

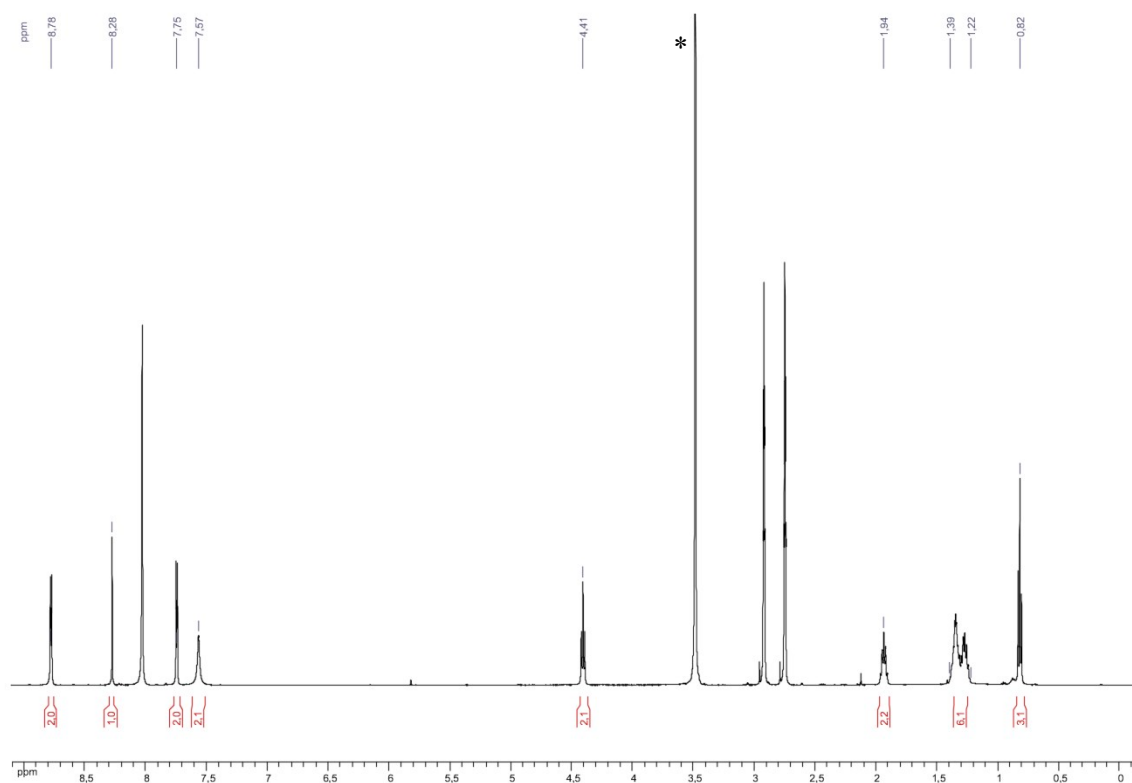

**Fig. ESI 27.**  $^{13}\text{C}$  NMR spectrum of  $\text{C}_6\text{A-4Py}$  (125 MHz,  $\text{d}_7\text{-DMF}$ , 298 K)

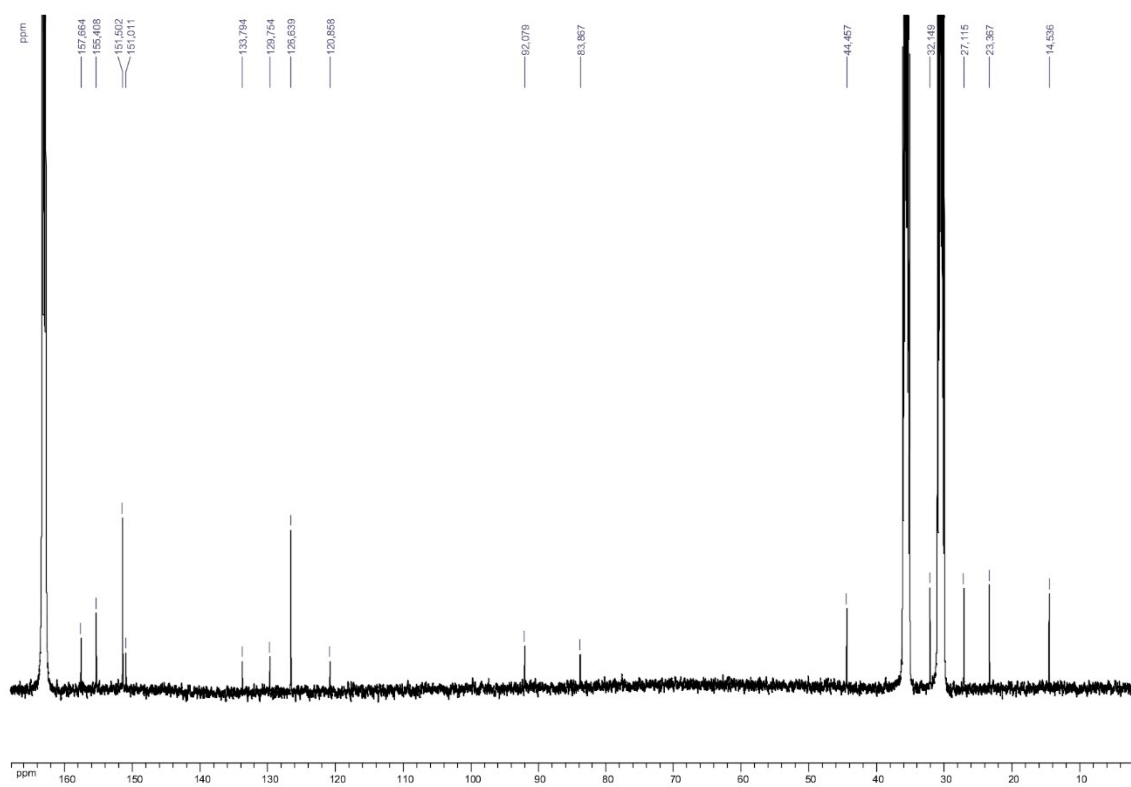

**Fig. ESI 28.**  $^1\text{H-}^1\text{H}$  COSY map of  $\text{C}_6\text{A-4Py}$  (500 MHz,  $\text{d}_7\text{-DMF}$ , 298K)

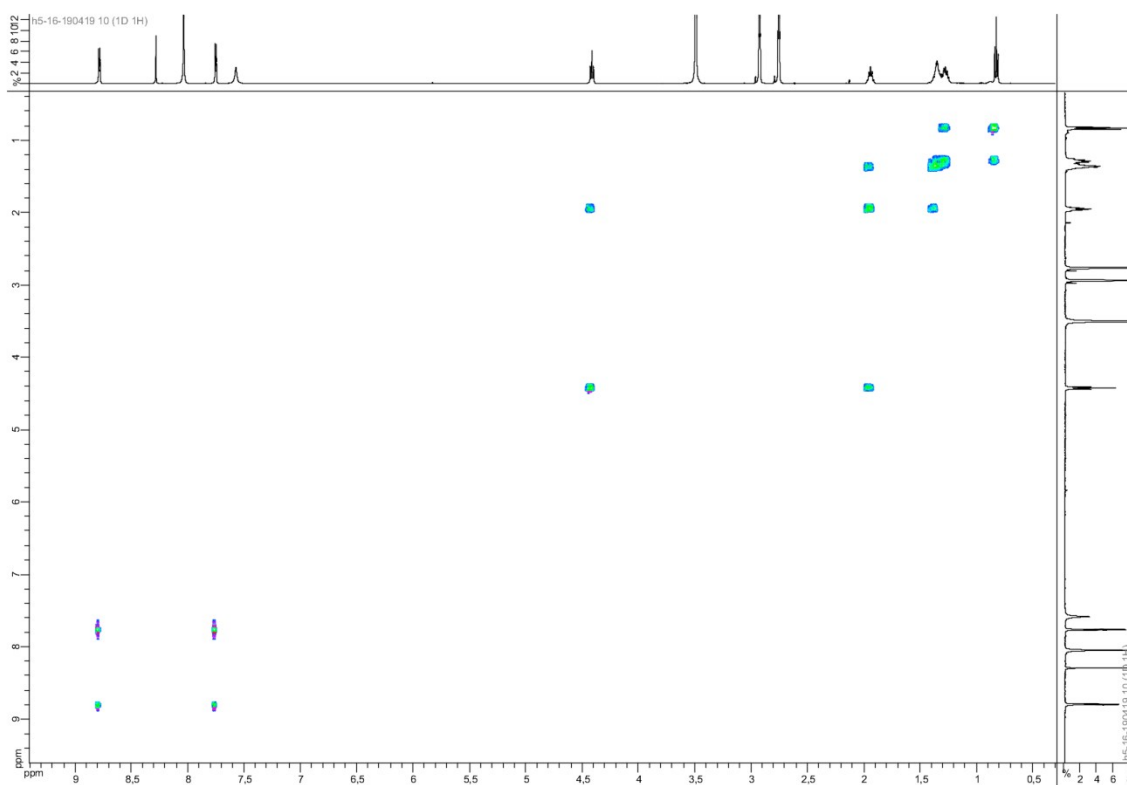



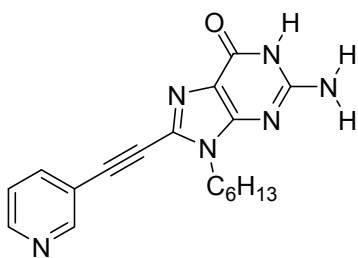

Chemical Formula:  
 $C_{18}H_{20}N_6O$   
 Exact Mass: 336,17  
 Molecular Weight: 336,40

**Fig. ESI 31.**  $^1H$  NMR spectrum of **C<sub>6</sub>G-3Py** (500 MHz,  $d_6$ -DMSO, 298 K). \* = water.

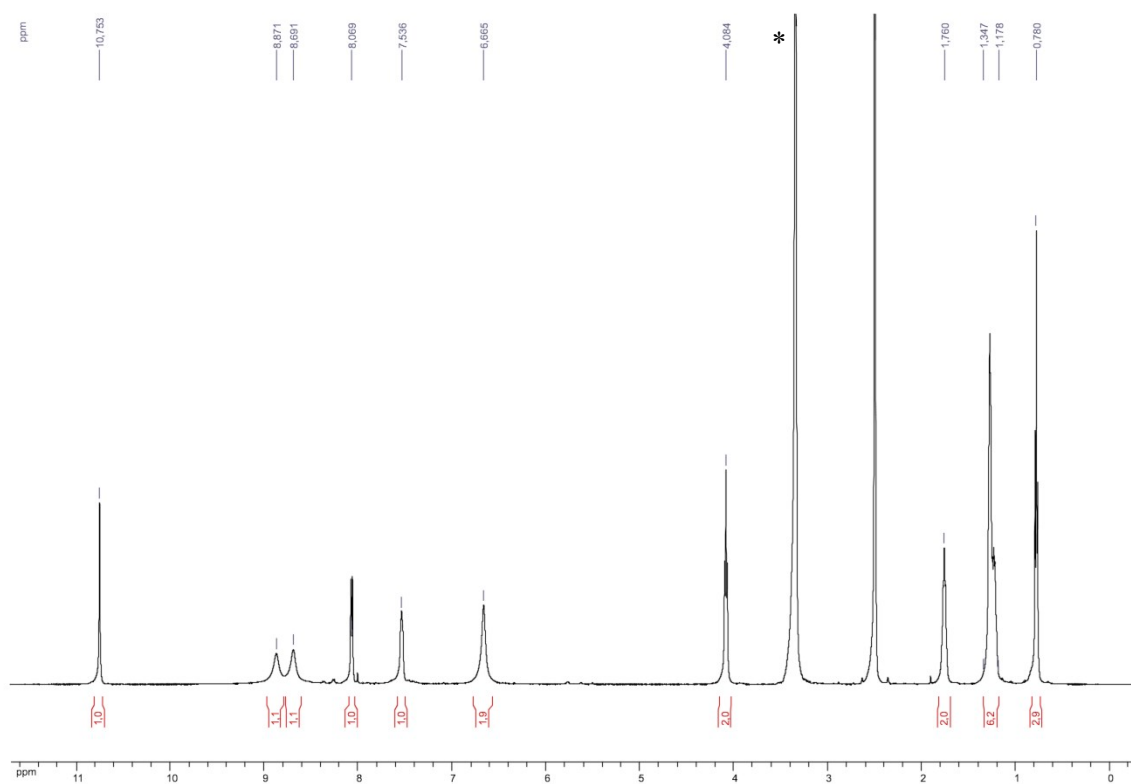

**Fig. ESI 32.**  $^{13}\text{C}$  NMR spectrum of  $\text{C}_6\text{G-3Py}$  (125 MHz,  $\text{d}_6\text{-DMSO}$ , 298 K)

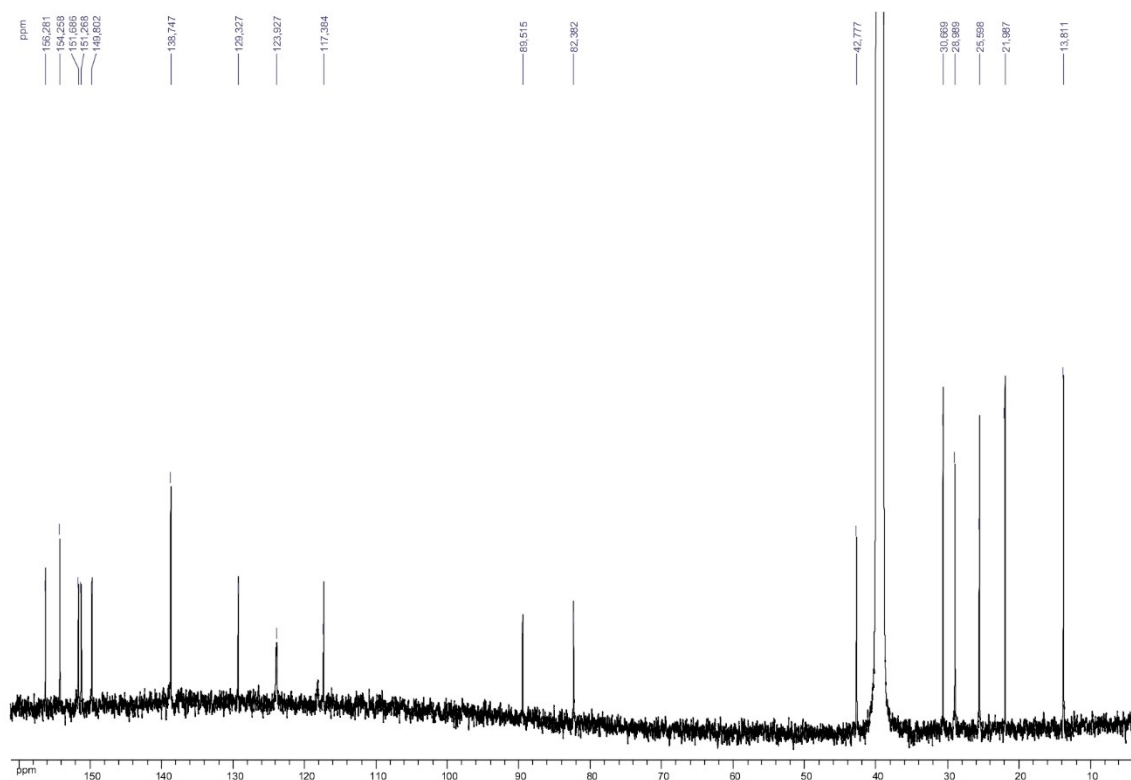

**Fig. ESI 33.**  $^1\text{H}$ - $^1\text{H}$  COSY map of  $\text{C}_6\text{G-3Py}$  (500 MHz,  $\text{d}_6\text{-DMSO}$ , 298K)

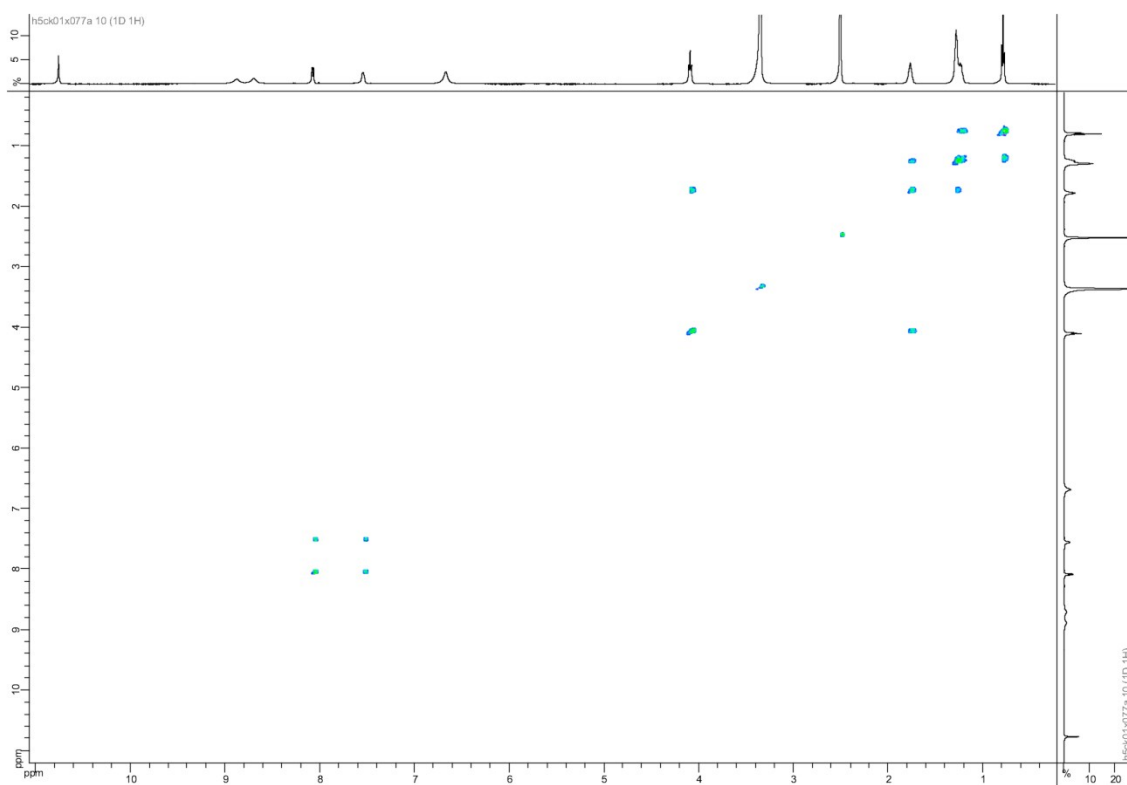



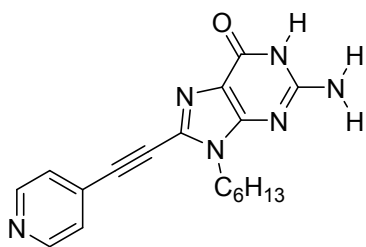

Chemical Formula:  
 $C_{18}H_{20}N_6O$   
 Exact Mass: 336,17  
 Molecular Weight: 336,40

**Fig. ESI 36.**  $^1H$  NMR spectrum of **C<sub>6</sub>G-4Py** (500 MHz,  $d_6$ -DMSO, 298 K). \* = water.

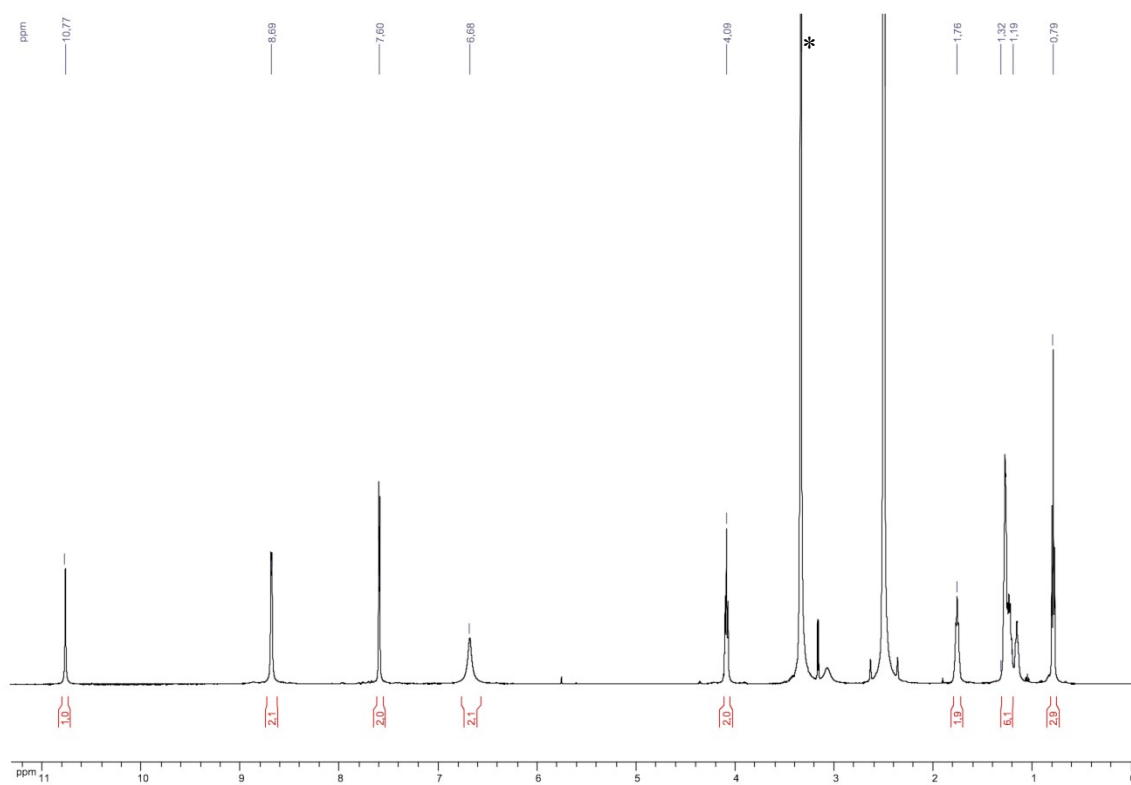

**Fig. ESI 37.**  $^{13}\text{C}$  NMR spectrum of  $\text{C}_6\text{G-4Py}$  (125 MHz,  $\text{d}_6\text{-DMSO}$ , 298 K)

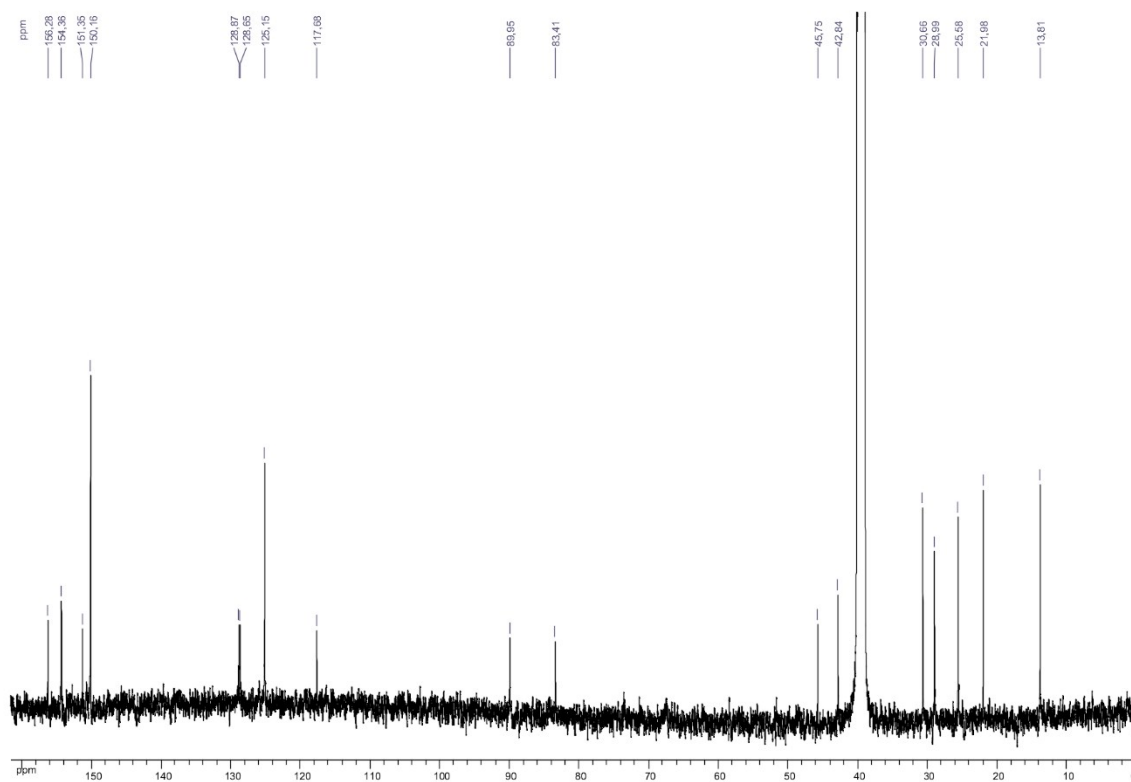

**Fig. ESI 38.**  $^1\text{H}$ - $^1\text{H}$  COSY map of  $\text{C}_6\text{G-4Py}$  (500 MHz,  $\text{d}_6\text{-DMSO}$ , 298K)

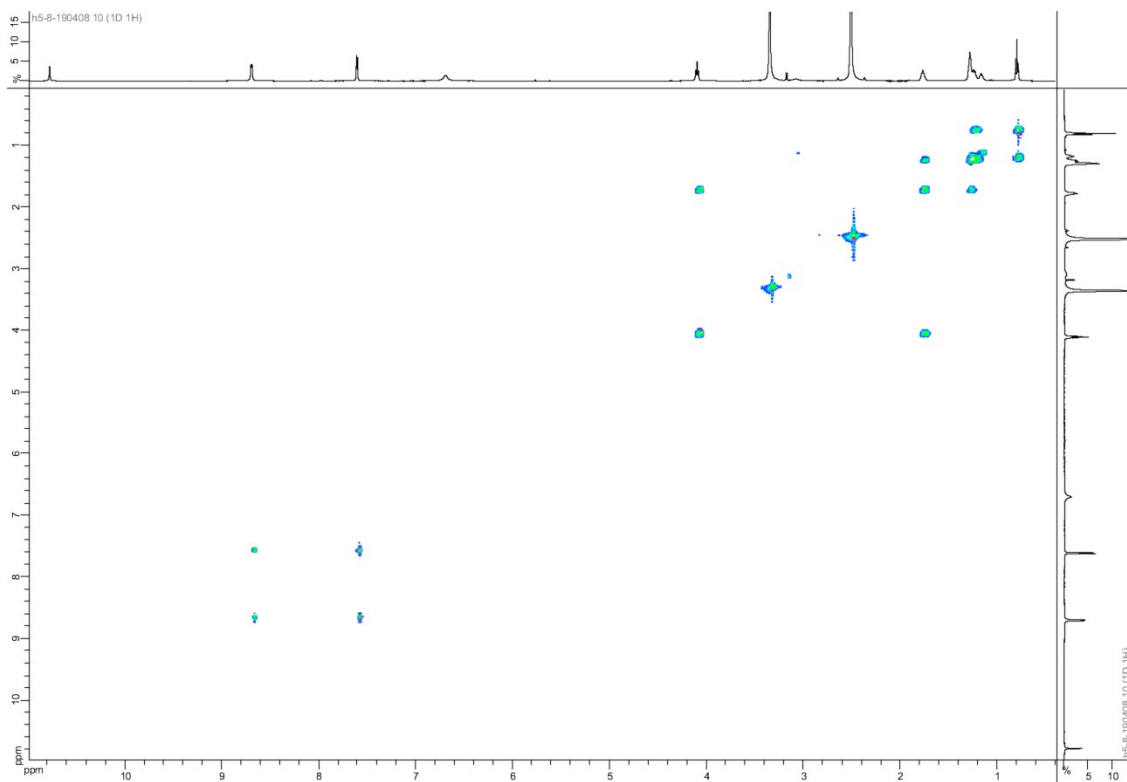





**Fig. ESI 41.** Simulated (red) and experimental (black) PRXD pattern for  $C_6G-4Py \bullet C_6C-4Py$ .

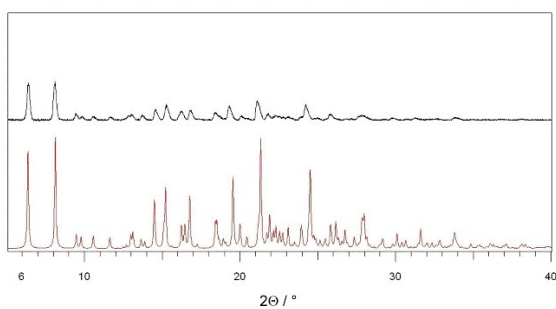

**Fig. ESI 42.** Simulated (red) and experimental (black) PRXD pattern for  $[(C_6C-3Py)_2(Cu(OAc)_2)_2](H_2O)_2$ .

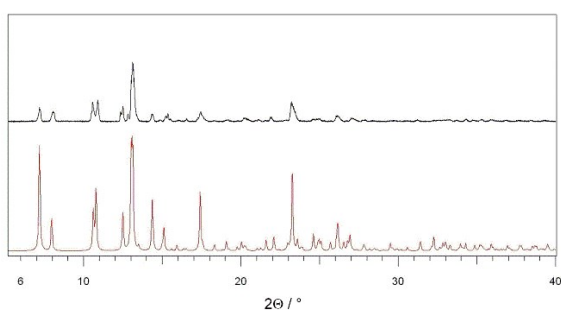

**Fig. ESI 43.** Simulated (red) and experimental (black) PRXD pattern for  $[(C_6A-3Py)Cu(hfac)_2](H_2O)$ . Difference in intensity arise from preferential orientation.

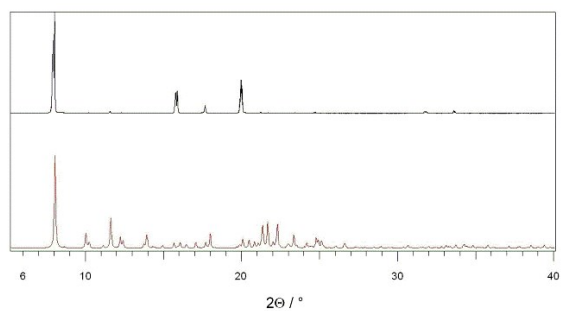

**Fig. ESI 44.** Simulated (red) and experimental (black) PRXD pattern for  $[(C_6A-4Py)(Cd(NO_3)_2(H_2O))](1,2-DCE)$ . Broadening of the peaks indicates solvent loss.

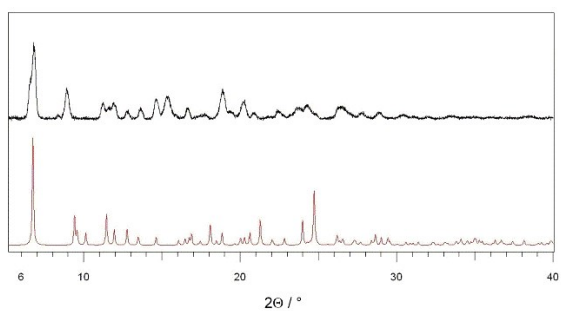

Supplement: d0ce01661f2.pdf [file d0ce01661f2.pdf]
